# Supplementary material for: Fabrication phosphomolybdic acid–reduced graphene oxide nanocomposite by UV photo-reduction and its electrochemical properties
Source: Royal Society of Chemistry journal article supplement (doi:10.1039/c3cp43638a), 2013-01-01
Supplement: c3cp43638a.pdf [file c3cp43638a.pdf]

## Supporting data

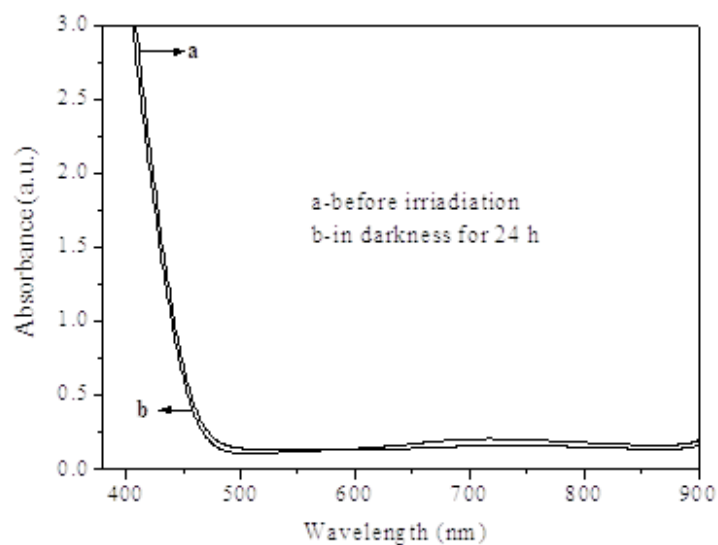

**Figure S1.** UV-vis spectra of the alcoholic solution which contains  $0.1 \text{ mg}\cdot\text{mL}^{-1}$  GO,  $20 \text{ mg}\cdot\text{mL}^{-1}$  PMoA and  $0.05 \text{ mL}\cdot\text{mL}^{-1}$  isopropanol before UV-irradiation (a), in darkness for 24 hours (b).

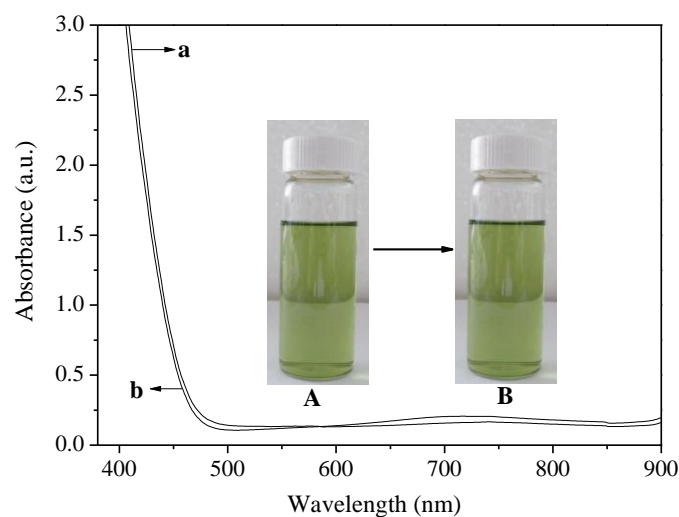

**Figure S2.** UV-vis spectra of the alcoholic solution which contains  $0.1 \text{ mg}\cdot\text{mL}^{-1}$  GO and  $20 \text{ mg}\cdot\text{mL}^{-1}$  PMoA before UV-irradiation (a), immediately after UV-irradiation for 60 min (b). Inset: color change of solution, A: before UV-irradiation, and B: after 60 min UV-irradiation.

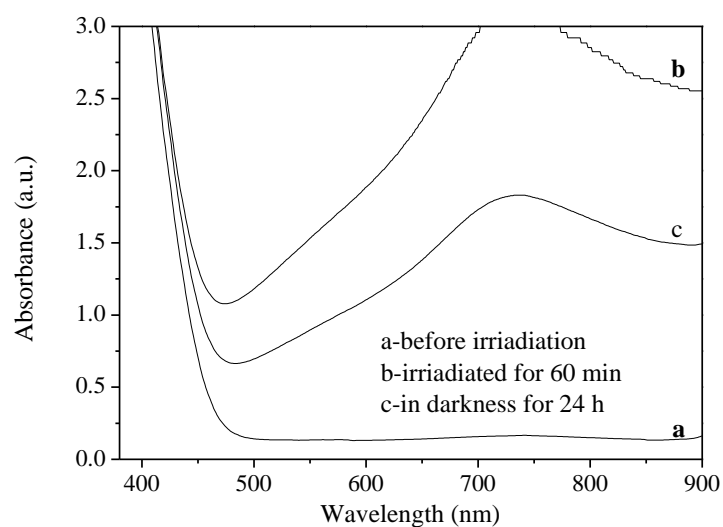

**Figure S3.** UV-vis spectra of the alcoholic solution which contains  $20 \text{ mg}\cdot\text{mL}^{-1}$  PMoA and  $0.05 \text{ mL}\cdot\text{mL}^{-1}$  isopropanol before UV-irradiation (a), immediately after UV-irradiation for 60 min (b), and after 24 hours in darkness (c).

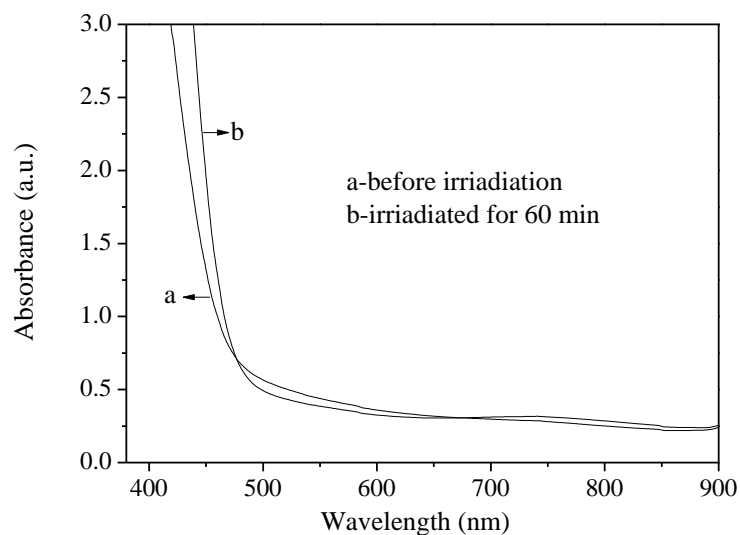

**Figure S4.** UV-vis spectra of the alcoholic solution which contains  $0.1 \text{ mg}\cdot\text{mL}^{-1}$  GO and  $0.05 \text{ mL}\cdot\text{mL}^{-1}$  isopropanol before UV-irradiation (a), immediately after UV-irradiation for 60 min (b).
